# Supplementary material for: IFN-γ stimulated murine and human neurons mount anti-parasitic defenses against the intracellular parasite Toxoplasma gondii
Source: PubMed Central journal article supplement (PMC9360015; doi:10.1038/s41467-022-32225-z), 2022-08-08
Supplement: 41467_2022_32225_MOESM1_ESM.pdf [file 41467_2022_32225_MOESM1_ESM.pdf]

1 **Supplementary Information for IFN- $\gamma$  stimulated murine and human**  
2 **neurons mount anti-parasitic defenses against the intracellular**  
3 **parasite *Toxoplasma gondii***

4

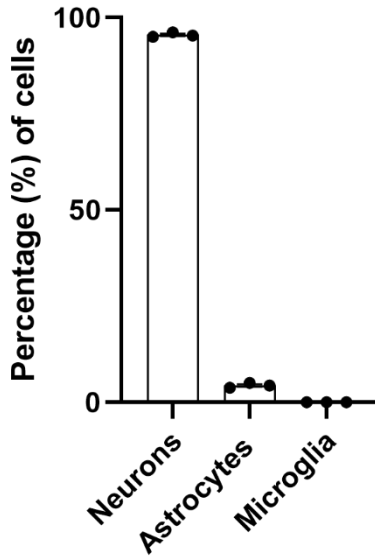

5

6 **Supplementary Figure 1. *In vitro* neuronal cultures show little glial contamination**

7 Quantification of different CNS cell types in primary murine neuron cultures. At 12 DIV,

8 cultures were fixed and stained with anti-Tuj1 antibodies (neurons), an anti-astrocyte

9 cocktail (anti-GFAP, anti-S100B, anti-ALDH1L1 antibodies), and anti-Iba1 antibodies

10 (microglia). The fixed and stained cultures were then analyzed by epifluorescent

11 microscopy. Bars, mean  $\pm$  SEM. N = 100 cells counted/experiment, 3 independent

12 experiments. Source data are provided as a Source Data file.

13

14

15

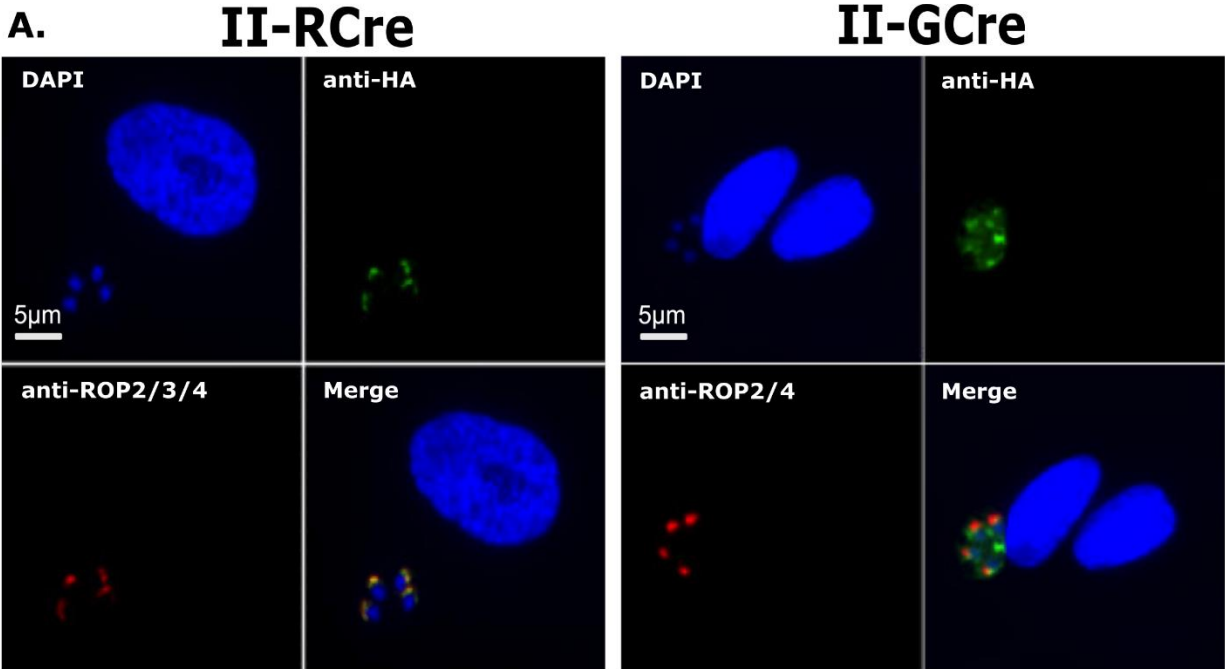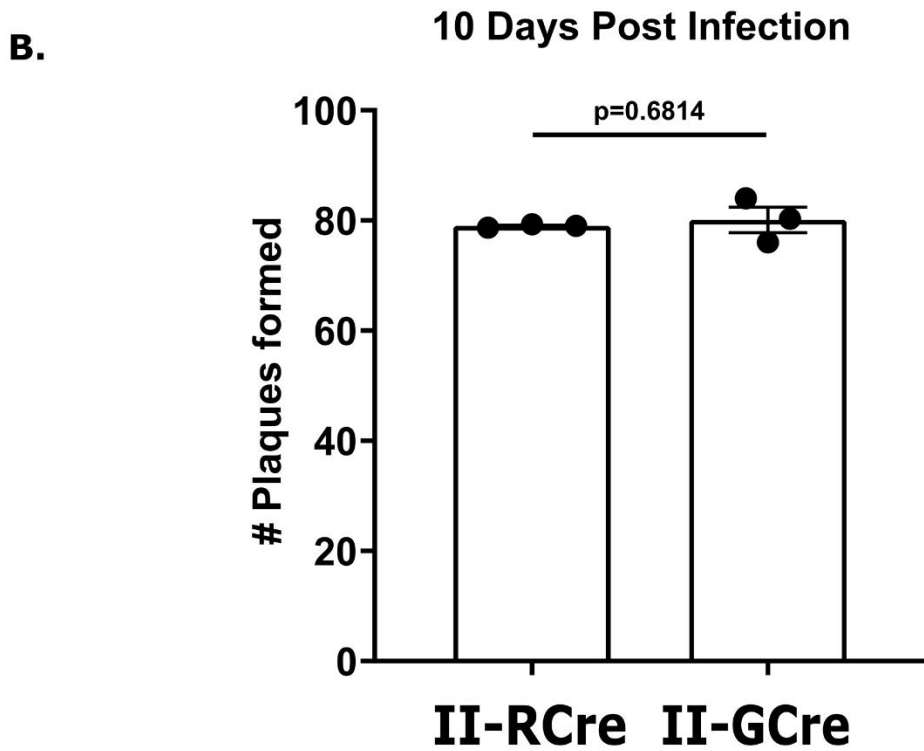

16

17

18

19 **Supplementary Figure 2. GCre expression does not affect parasite viability.**

20 **A.** Representative images of immunofluorescent assays with parasites that express HA-  
21 tagged RCre or GCre fusion proteins. HFFs were infected with identified strains  
22 (MOI=1) for 24 hours, after which the cultures were fixed and stained with anti-HA  
23 antibodies, anti-ROP2/4 antibodies, and DAPI. Green = anti-HA antibodies, red = anti-  
24 ROP2/4 antibodies, and blue = DAPI. **B.** Quantification of plaque assays. HFFs were  
25 infected with 200 parasites of the indicated strains. At 10 dpi, the cultures were fixed,  
26 stained with Cresyl violet, and plaques counted. Bars, mean  $\pm$  SEM. Each dot = 1  
27 experiment, N = 3 independent experiments. Unpaired t-test with Welch's t correction.  
28 Source data are provided as a Source Data file.

29

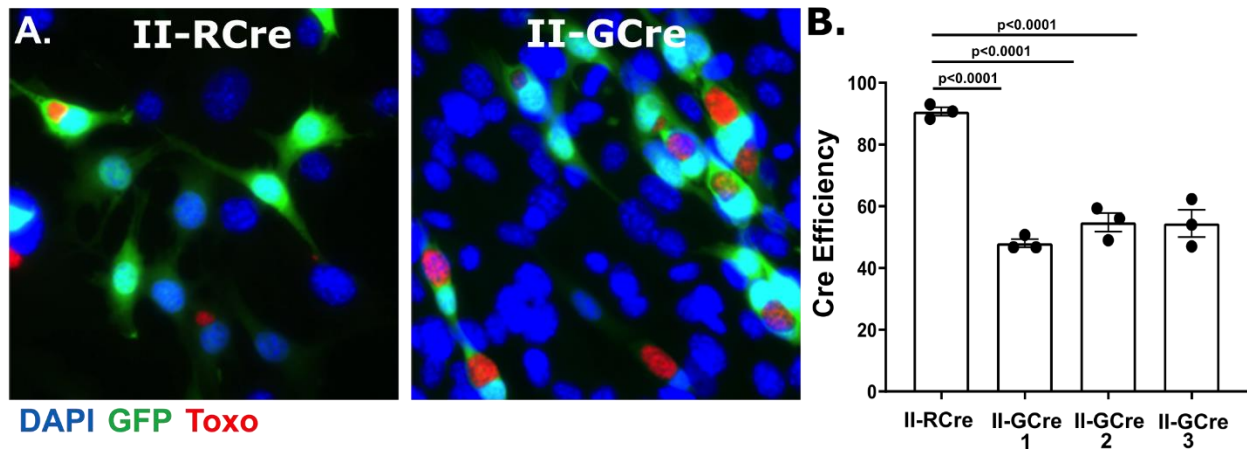

31

### 32 **Supplementary Figure 3. II-GCre is capable of Cre-mediated recombination**

33 Cre reporter fibroblast that express GFP only after Cre-mediated recombination were  
 34 infected with identified strains (MOI 1) for 24 hours and then fixed and stained with anti-  
 35 SAG1 antibodies and DAPI. Green = GFP; red = anti-SAG1 antibodies; and blue =  
 36 DAPI. **A.** Representative merged images of infected Cre reporter fibroblasts cultures wit  
 37 listed strains. **B.** Quantification of Cre-mediated recombination efficiency. Cre reporter  
 38 fibroblasts were infected with II-RCre parasites or 3 different II-GCre clones. Efficiency  
 39 at triggering Cre-mediated recombination was quantified by dividing the number of  
 40 GFP<sup>+</sup> parasite<sup>+</sup> cells by the total number of parasite<sup>+</sup> cells multiplied by 100. Bars,  
 41 mean ± SEM. N = 100 infected cells/experiment, 3 experiments/strain or clone. One-  
 42 way ANOVA with Dunnett's multiple comparison test. Source data are provided as a  
 43 Source Data file.

44

45

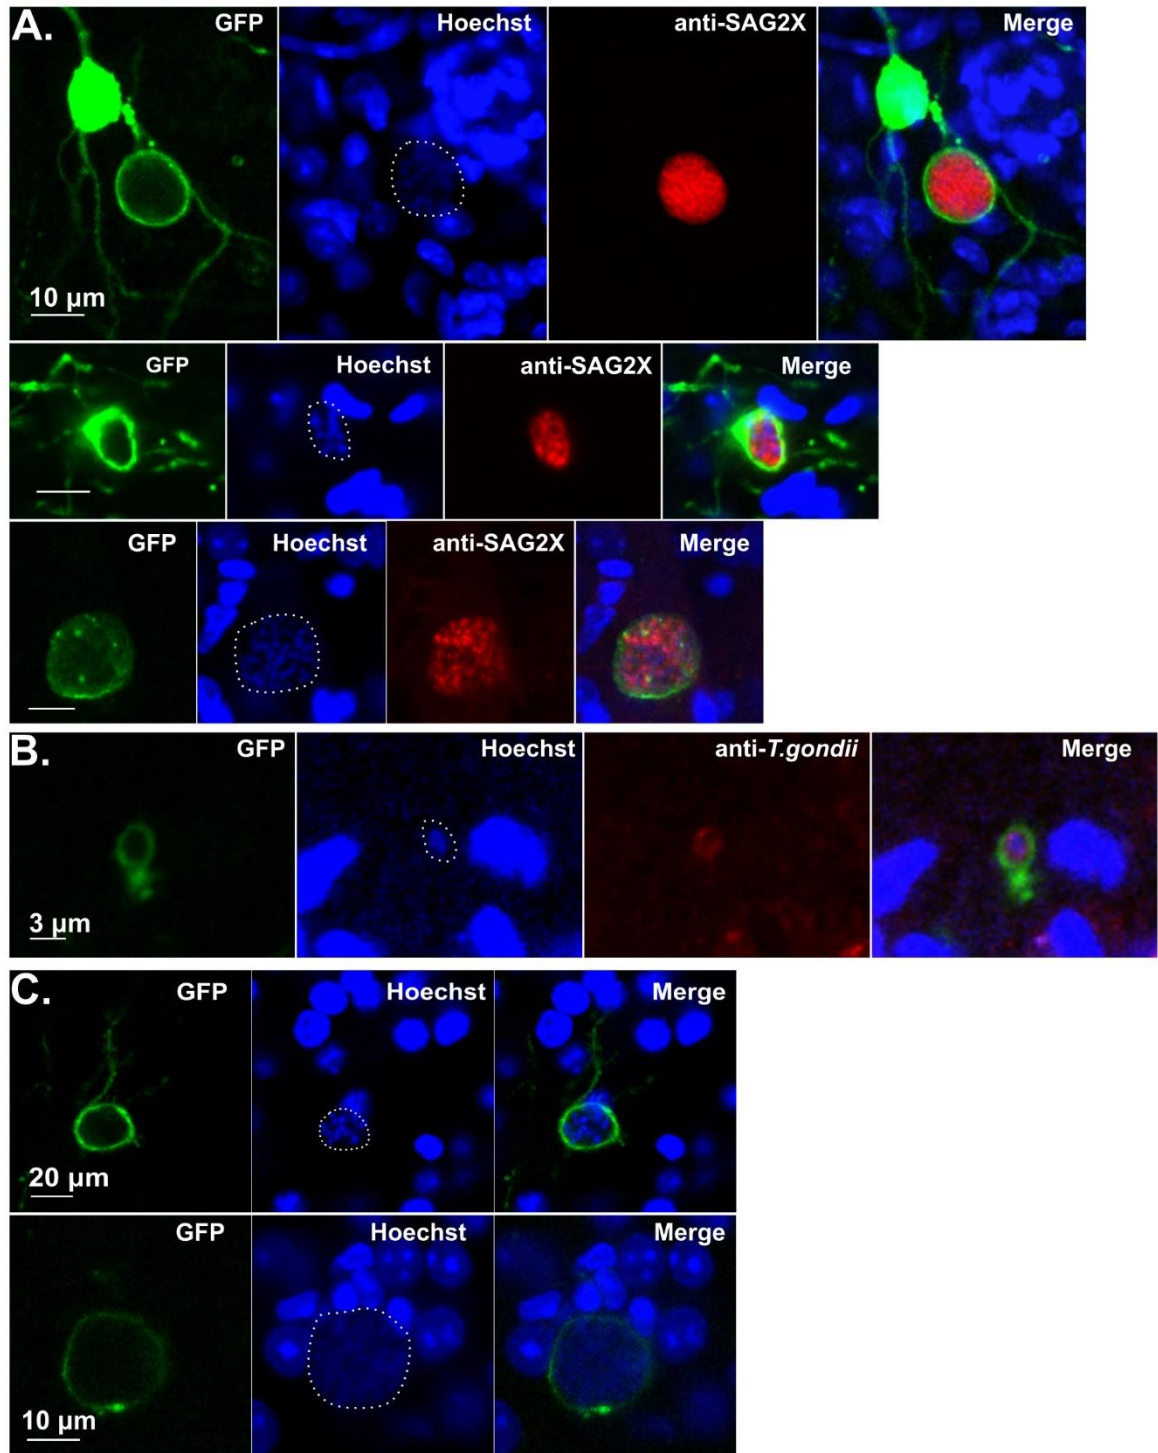

46

47

48 **Supplementary Figure 4. Hoechst staining of *T. gondii* nuclei coincides with anti-**

49 ***T. gondii* antibody staining. To confirm that Hoechst<sup>+</sup> DNA found within GFP<sup>+</sup>**

50 neurons identified *T. gondii* nuclei, PACT cleared 200  $\mu\text{m}$  thick brain sections were  
51 stained with either of two anti-*T. gondii* antibodies (mouse anti-SAG2X or rabbit  
52 polyclonal anti-*T. gondii*), followed by imaging on a confocal microscope and rendering  
53 using Imaris software. Panels **A-C** show individual slices of the z-stacks. Green = GFP,  
54 blue = Hoechst, and red = anti-*T. gondii* antibodies. White dotted circles in Hoechst  
55 panel identifies stained parasite DNA. **A.** Representative images of 3 different infected  
56 GFP<sup>+</sup> neurons from sections stained with anti-SAG2X antibodies. Note how GFP is  
57 excluded from the parasitophorous vacuole (PV). Scale bar 10  $\mu\text{m}$ . Six of 18 *T.*  
58 *gondii*<sup>+</sup>GFP<sup>+</sup> neurons were confirmed with anti-SAG2X antibody staining. **B.**  
59 Representative images of a GFP<sup>+</sup> neuron from a section stained with anti-*T. gondii*  
60 antibodies. Note that this PV contains only one parasite. Eight of 18 *T. gondii*<sup>+</sup>GFP<sup>+</sup>  
61 neurons were confirmed with anti-*T. gondii* antibody staining **C.** Representative images  
62 of two more infected GFP<sup>+</sup> neurons, where GFP exclusion and Hoechst are used to  
63 identify parasite infected neurons. Four of 18 *T. gondii*<sup>+</sup>GFP<sup>+</sup> neurons were confirmed  
64 by Hoechst staining only.

65  
66  
67  
68  
69  
70  
71  
72

73

74

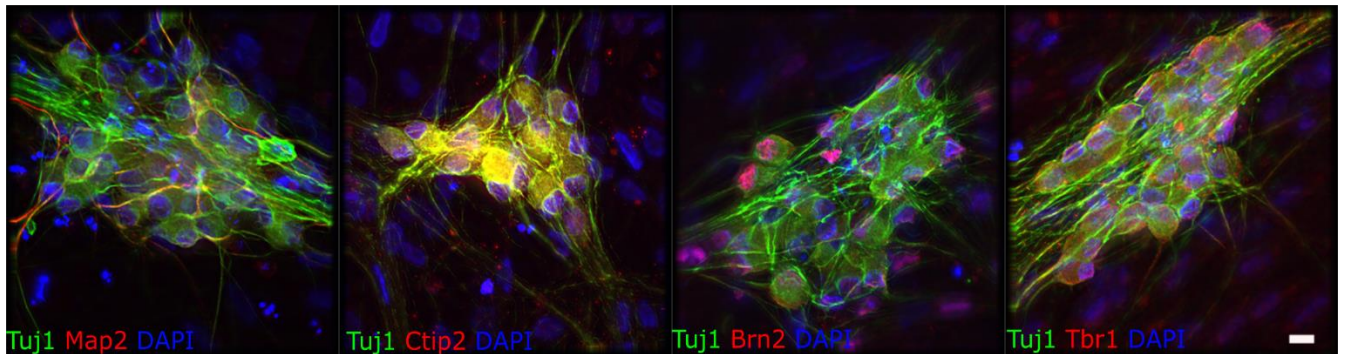

75

76 **Supplementary Figure 5. Characterization of human neurons for cortical layer**

77 **markers**

78 Representative images of hPSC neurons stained with different markers for mature  
79 cortical neurons. HPSC neurons were grown and differentiated for 14 days, after which  
80 cultures were fixed and stained with DAPI (blue), anti-Tuj1 antibodies (pan neuronal  
81 marker, green) and one of the following (red): anti-Map2 antibodies (global mature  
82 neuronal marker), anti-Ctip2 antibodies (cortical layer V, VI), anti-Brn2 antibodies  
83 (cortical layer II-V), or anti-Tbr1 antibodies (cortical layer I, V, VI). Scale bar = 25 $\mu$ m.

84 The staining for the markers were performed for neurons from two independent  
85 differentiations.

86

**Supplementary Table 1. Primers used in this paper**

| <b>Gene name</b> | <b>Primer sequence</b>                                                                      |
|------------------|---------------------------------------------------------------------------------------------|
| <b>STAT1</b>     | FP: AAAGTCATGGCTGCCGAGAA<br>RP: CATCGGTTCTGGTGCTTCCT                                        |
| <b>IRF1</b>      | FP: ATCTCGGGCATCTTTCGCTT<br>RP: TGATTGGCATGGTGGCTTTG                                        |
| <b>Irgm1</b>     | FP: CATAGGGA ACTTCTGCCGGA<br>RP: AACTCCTCAAACCCTGATCCA                                      |
| <b>Gbp2</b>      | FP: AGCTGCTAAACTTCGGGAACA<br>RP: GCCTTGGGCCTTCAGAGTAT                                       |
| <b>Irgb6</b>     | FP: GAGCTTCTACCATACAGAGCCATG<br>RP: CACTCTCGATGTCTCTCAGTACC                                 |
| <b>Irga6</b>     | FP: GTGCTCAATGTTGCTGTCACC<br>RP: CACCCAGTTTTAGCTGCAC                                        |
| <b>MHCI</b>      | FP: CAAGAGCAGTGGTTCGAGTGAG<br>RP: TTTTCAGGTCTTCGTT CAGGGCG                                  |
| <b>Cre CDS</b>   | FP: GGCGCCCCAAGAAGAAG<br>RP: GATCAGCACGAAACCTTGC                                            |
| <b>Gra16 CDS</b> | FP: GGTTTCGTGCTGATCGCCGTT CATTGCATTCAGAATACG<br>RP: CTTCTTGGGGGCGCCCATCTGATCATTTTTCCGCTTCGC |
